# Supplementary material
Source: PubMed Central journal article supplement (PMC3940669)
Supplement: NIHMS506627-supplement-1_si_001.pdf [file NIHMS506627-supplement-1_si_001.pdf]

## Supporting information

# Novel monodisperse PEGtide dendrons: design, fabrication and evaluation of mannose receptor-mediated macrophage targeting

Jieming Gao,<sup>†</sup> Peiming Chen,<sup>†</sup> Yashveer Singh,<sup>‡</sup> Xiaoping Zhang,<sup>†</sup> Zoltan Szekely,<sup>†</sup> Stanley Stein,<sup>†</sup> and Patrick J. Sinko<sup>\*,†</sup>

<sup>†</sup>Department of Pharmaceutics, Ernest Mario School of Pharmacy, Rutgers, The State University of New Jersey, Piscataway, New Jersey 08854, United States

<sup>‡</sup>Department of Chemistry, Indian Institute of Technology Ropar, Nangal Road, Rupnagar, Punjab, 140001, India

\* *Corresponding author.*

Tel: 1 848 445 6398

Fax: 1 732 445 4271

Email: sinko@rutgers.edu

## Table of Contents

| Contents                                                                       | Page numbers |
|--------------------------------------------------------------------------------|--------------|
| HPLC profiles of G1.0-G5.0 PEGtide dendrons                                    | S2           |
| MALDI-TOF mass spectra of G1.0-G3.0 dendrons                                   | S3           |
| HPLC profile and MALDI-TOF spectrum of G3.0-mannose <sub>8</sub>               | S4           |
| DLS profile of G3.0-mannose <sub>8</sub> and size stability evaluation on G4.0 | S5           |
| DLS profiles of cellular culture medium with and without G4.0 dendrons         | S6           |

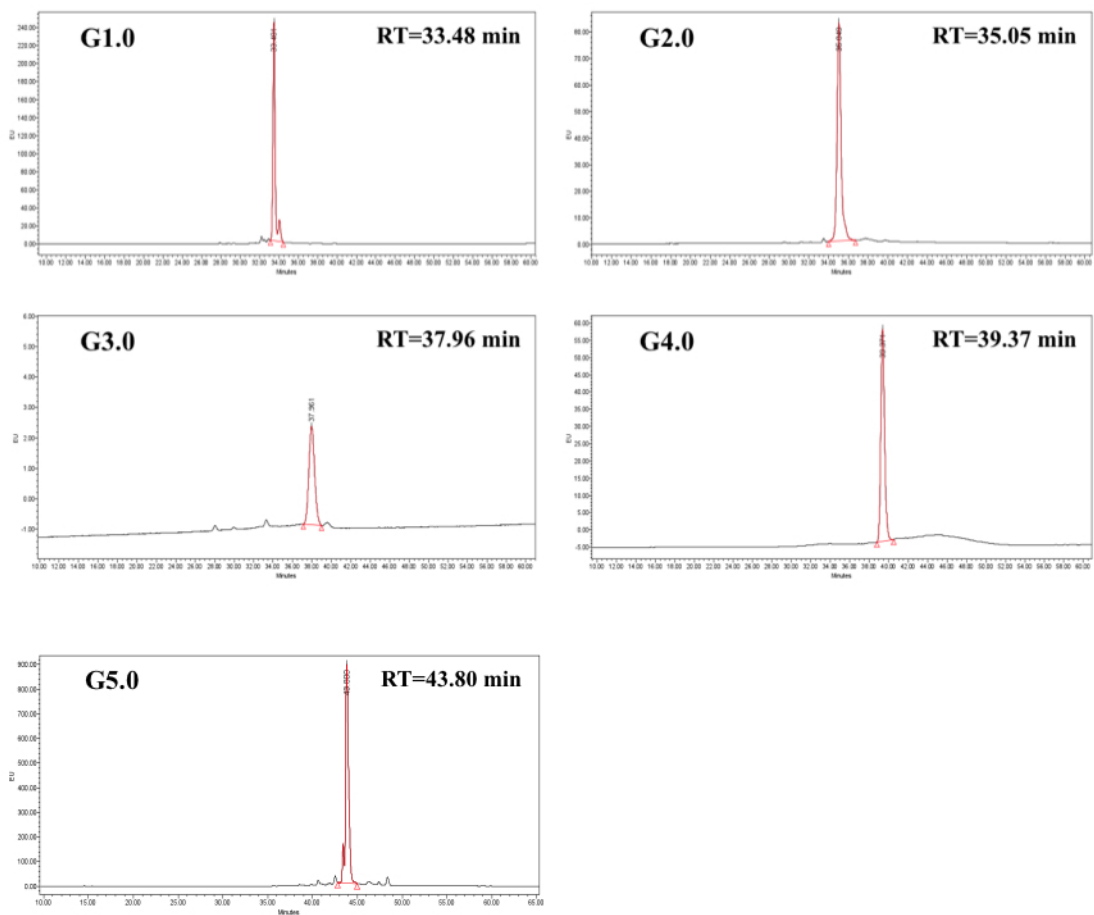

**Figure S1.** RP-HPLC profiles of purified PEGtide dendrons, G1.0 to G5.0. Column: Symmetry<sup>®</sup> C18, 5  $\mu\text{m}$ , 100  $\text{\AA}$ , 4.6 $\times$ 150 mm; Mobile phase: A: 0.05% TFA in water, B: 0.05% TFA in acetonitrile. Retention times for G1.0, G2.0, G3.0, G4.0, and G5.0 are 33.48, 35.05, 37.96, 39.37, and 43.80 min, respectively. The percentage purities of G1.0-5.0 dendrons were found as 98.3, 99.0, 96.8, 98.9, and 97.1, respectively.

**G1.0**

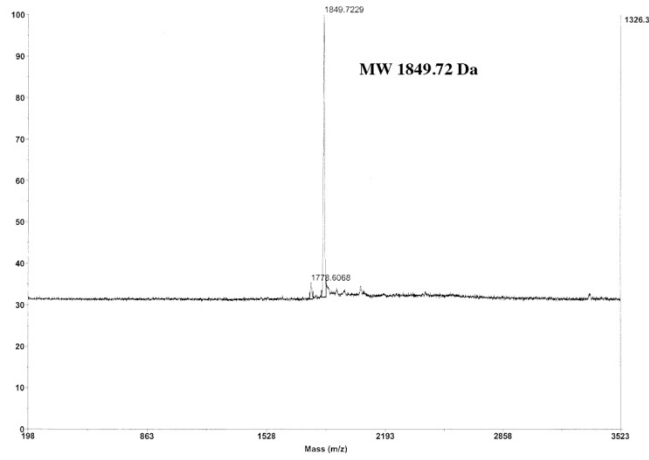

**G2.0**

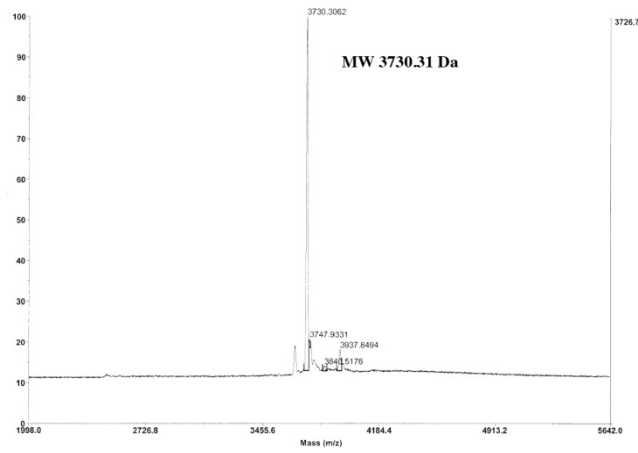

**G3.0**

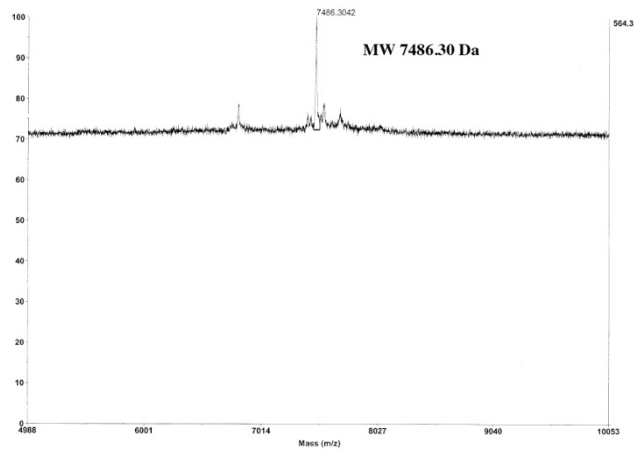

**Figure S2.** MALDI-TOF spectra of PEGtide dendrons, G1.0 to G3.0. The molecular weights of G1.0, G2.0, and G3.0 were estimated as 1849.72, 3730.31, and 7486.30 Da, respectively, which were in agreement with calculated values  $[M+H]^+$  of 1850.94, 3733.06, and 7495.29 Da.

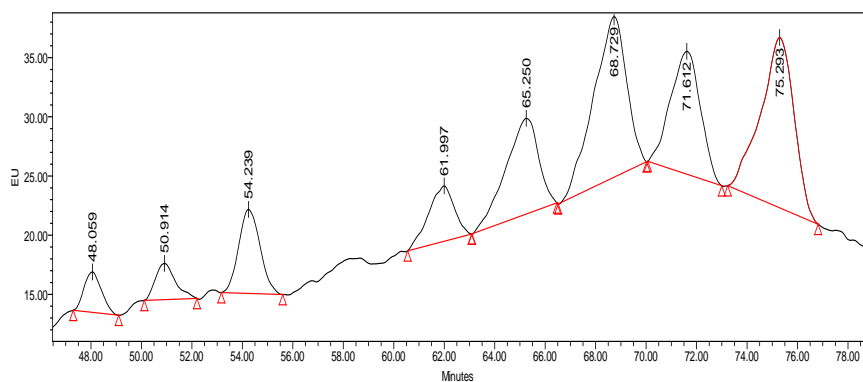

**Figure S3.** HPLC profile of crude G3.0-mannose<sub>8</sub>. Fraction corresponding to retention time of 75.3 minute was collected and analyzed by MALDI-TOF (see below). Method: Symmetry<sup>®</sup>C18 column (4.6 × 150 mm, particle size 5 μm); flow rate: 1 mL per minute; and gradient: 0.05% per minute.

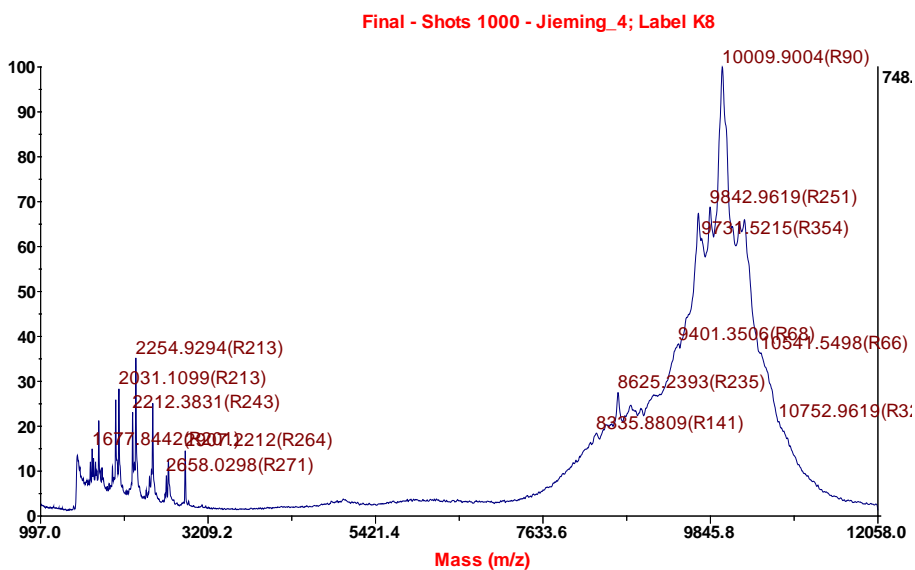

**Figure S4.** MALDI-TOF spectrum of purified G3.0-mannose<sub>8</sub>. The observed molecular weight is 10009.9 Da, whereas the calculated molecular weight  $[M+H]^+$  is 10004.9 Da. The observed molecular weight corresponds to attachment of eight mannose moieties on dendron surface.

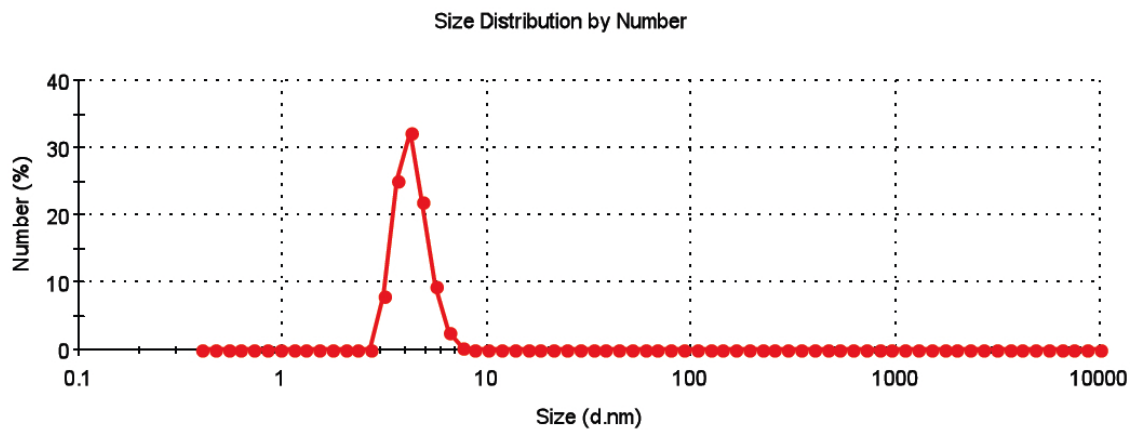

Figure S5. DLS profile of G3.0-mannose<sub>8</sub> (hydrodynamic diameter ~ 4.3 nm).

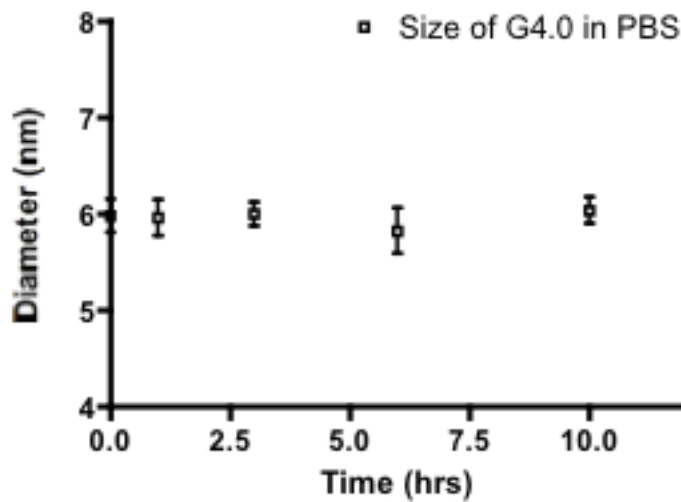

Figure S6. Size stability evaluation of G4.0 dendrons in PBS (0.1 M, pH 7.0).

(a)

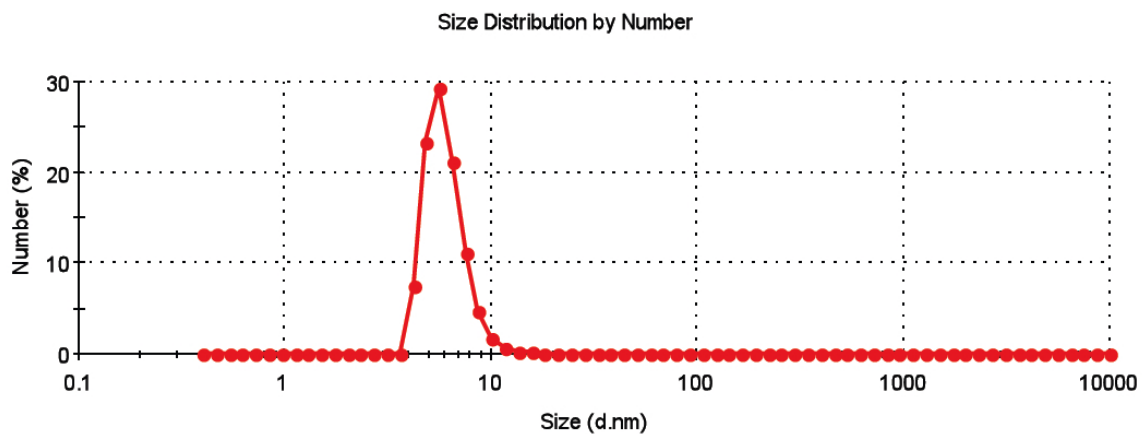

(b)

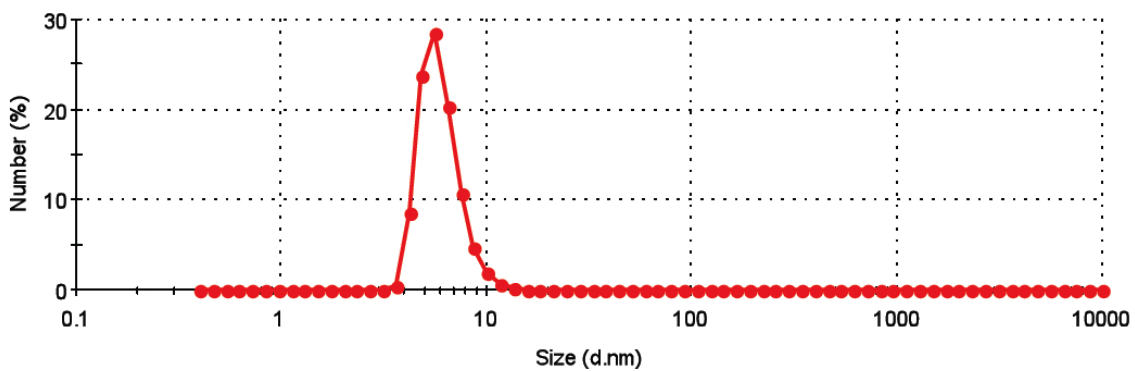

**Figure S7.** DLS profiles of cellular culture medium with G4.0 dendrons (a) and without G4.0 dendrons (b).
